# Supplementary material for: Volumetric Properties for the Aqueous Solution of Yttrium Trichloride at Temperatures from 283.15 to 363.15 K and Ambient Pressure
Source: Hindawi journal article supplement (doi:10.1155/2021/4541213), 2021-11-09
Supplement: f1 [file 4541213.f1.docx]

**Volumetric Properties for the Aqueous Solution of Yttrium Trichloride at Temperatures from 283.15 to 363.15 K and Ambient Pressure**

Zhenzhen Jiang a,b, Chi Ma a, Gaoling Liu b, Kangrui Sun a, Mingli Li b, Yafei Guo a, Lingzong Meng c, Tianlong Deng a,*

a *Tianjin Key Laboratory of Brine Chemical Engineering and Resource Eco-utilization, College of Chemical Engineering and Materials Science, Tianjin University of Science and Technology, Tianjin 300457,* *PR China*

b *Central Laboratory of Geological Mineral Exploration and Development Bureau of Tibet Autonomous Region, Tibet 850033, PR China*

c *School of Chemistry and Chemical Engineering, Linyi University, Linyi 27600, PR China*

* Corresponding author: E-mail: [tldeng@tust.edu.cn](mailto:tldeng@tust.edu.cn).

**Table S1**

The values of the parameters in Eq. 1 with the correlation coefficient (*r*) for the aqueous solution system (YCl3 – H2O) at 101 kPa a.

| *mi* / mol·kg-1 | *A0* | 104*A1* | 106*A2* | 109*A3* | *r* | σ |
| --- | --- | --- | --- | --- | --- | --- |
| 0.08837 | 1.01634 | -0.18551 | -5.31976 | 13.6361 | 1.00000 | 0.000060 |
| 0.31207 | 1.05631 | -0.80778 | -4.42461 | 10.17720 | 1.00000 | 0.000030 |
| 0.52215 | 1.09253 | -1.32768 | -3.69386 | 7.34262 | 0.99999 | 0.000010 |
| 0.72660 | 1.12673 | -1.71759 | -3.23557 | 6.23208 | 1.00000 | 0.000002 |
| 0.93877 | 1.16178 | -2.11258 | -2.72379 | 4.48056 | 1.00000 | 0.000005 |
| 1.16667 | 1.19793 | -2.50887 | -2.20095 | 2.53698 | 1.00000 | 0.000009 |
| 1.38637 | 1.23132 | -2.79030 | -1.88648 | 1.82491 | 1.00000 | 0.000008 |
| 1.60639 | 1.26416 | -3.04325 | -1.62167 | 1.11914 | 1.00000 | 0.000004 |

a Standard uncertainties *u* are *u*(*T*) = 0.01 K, *u*(*p*) = 5 kPa, and *u*(*mi*) for YCl3 aqueous solution

is 0.005 mol·kg-1.

**Table S2**

The values of the parameters in Eq. 7 with the correlation coefficient (*r*) for the aqueous solution system (YCl3 – H2O) at 101 kPa a.

| *T* / K | *B0* | *B1* | *B2* | *B3* | *B4* | *r* |
| --- | --- | --- | --- | --- | --- | --- |
| 283.15 | 15.71611 | -20.30905 | 65.85922 | -57.07247 | 17.93519 | 0.99776 |
| 288.15 | 16.17559 | -18.91633 | 64.27831 | -56.84407 | 18.07772 | 0.99766 |
| 293.15 | 16.79538 | -18.17855 | 62.23463 | -55.21282 | 17.60951 | 0.99757 |
| 298.15 | 17.46605 | -19.61246 | 65.01349 | -57.64584 | 18.34391 | 0.99745 |
| 303.15 | 17.34812 | -17.45442 | 60.76167 | -54.29018 | 17.38953 | 0.99739 |
| 308.15 | 17.37474 | -17.64992 | 61.64773 | -55.30063 | 17.74212 | 0.99743 |
| 313.15 | 17.28912 | -17.57709 | 61.65146 | -55.35443 | 17.76898 | 0.99746 |
| 318.15 | 16.93343 | -16.72559 | 60.07816 | -54.02890 | 17.37913 | 0.99747 |
| 323.15 | 17.41365 | -21.15342 | 68.67102 | -60.83404 | 19.31899 | 0.99743 |
| 328.15 | 17.22246 | -22.88652 | 72.50482 | -63.96258 | 20.22766 | 0.99750 |
| 333.15 | 17.04816 | -24.65837 | 75.69283 | -66.14204 | 20.77855 | 0.99756 |
| 338.15 | 16.36545 | -24.89428 | 76.80198 | -67.05910 | 21.04429 | 0.99765 |
| 343.15 | 15.96987 | -26.39072 | 79.42264 | -68.74465 | 21.46229 | 0.99773 |
| 348.15 | 15.53493 | -28.28493 | 83.08648 | -71.42280 | 22.20980 | 0.99795 |
| 353.15 | 14.82258 | -30.14638 | 87.73871 | -75.33704 | 23.38335 | 0.99807 |
| 358.15 | 13.69162 | -30.09371 | 88.87685 | -76.55147 | 23.81263 | 0.99829 |
| 363.15 | 11.07372 | -22.06983 | 75.00919 | -65.83527 | 20.81822 | 0.99799 |

a Standard uncertainties *u* are *u*(*T*) = 0.01 K, *u*(*p*) = 5 kPa.
